# Supplementary material for: A direct continuous fluorometric turn-on assay for monoamine oxidase B and its inhibitor-screening based on the abnormal fluorescent behavior of silole
Source: Royal Society of Chemistry journal article supplement (doi:10.1039/c0an00168f), 2010-01-01

# A direct continuous fluorometric turn-on assay for monoamine oxidase B and inhibitor screening based on the abnormal fluorescent behavior of silole

Lihua Peng,<sup>a,b</sup> Guanxin Zhang,<sup>a\*</sup> Deqing Zhang,<sup>a\*</sup> Yilin Wang,<sup>a</sup> Daoben Zhu<sup>a</sup>

<sup>a</sup>Beijing National Laboratory for Molecular Science, Organic Solids Laboratory, Institute of Chemistry, Chinese Academy of Sciences, Beijing 100190, China

<sup>b</sup>Graduate School of Chinese Academy of Sciences, Beijing 100190, China.

E-mail: dqzhang@iccas.ac.cn

## 1. Synthesis and characterization of compound 2

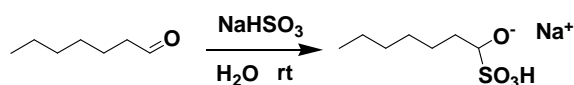

Scheme S1 The synthetic route for compound 2

**Synthesis of compound 2<sup>SI</sup>:** Sodium bisulfite (5.2 g, 50 mmol) were added to the aqueous solution (10 mL) of heptylaldehyde (1.4 mL, 10 mmol) at room temperature. Immediately, white precipitates appeared. The precipitates were filtered and crystallized with water, and then dried under vacuum. A water-soluble white solid was obtained (1.9 g, 87.2%). <sup>1</sup>H-NMR (400 MHz, D<sub>2</sub>O, ppm): δ 0.87-0.90 (t, *J* = 6.6 Hz, 3H), 1.32-1.46 (m, 8H), 1.54-1.56 (m, 1H), 1.67-1.71 (m, 1H), 1.94-1.97 (m, 1H), 4.37-4.41 (q, 1H); <sup>13</sup>C NMR (100 MHz, D<sub>2</sub>O, ppm): δ 84.2, 31.0, 30.9, 28.1, 24.9, 22.1, 13.5.

Reference:

S1. Y. Itoh, J. P. Horiuchi and K. Takahashi, *Colloids and Surfaces A: Physicochem. Eng. Aspects.*, 2007, **308**, 118-122.

## 2. Fluorescence spectra of the ensemble of silole **1** and heptylaldehyde containing NaHSO<sub>3</sub> after incubation for different times

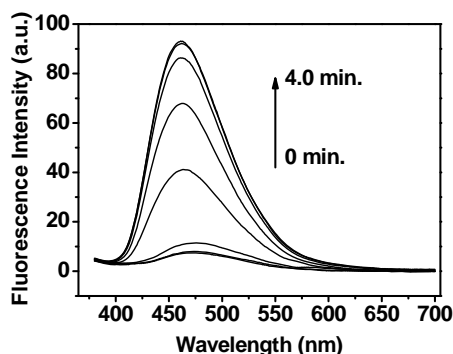

**Fig. S1** Fluorescence spectra ( $\lambda_{ex.} = 370$  nm) of the ensemble of silole **1** ( $7.5 \times 10^{-5}$  M) and heptylaldehyde ( $1.0 \times 10^{-4}$  M) and NaHSO<sub>3</sub> ( $1.0 \times 10^{-4}$  M) in the mixture of HEPES buffer (10 mM, pH = 7.4) and THF (200:1, v/v) after incubation for different times.

## 3. Isothermal titration microcalorimetry (ITC) study of compound **2**

The calorimetric measurements were conducted using a TAM 2277-201 microcalorimetric system (Thermometric AB, Järfälla, Sweden) with a stainless steel sample cell of 1.0 mL. The cell was initially loaded with H<sub>2</sub>O. The concentrated solution of compound **2** was injected into the sample cell via a 500  $\mu$ L Hamilton syringe controlled by a 612 Thermometric Lund pump. A series of injections were made until the desired range of concentration had been covered. The system was stirred at 50 rpm with a gold propeller. The observed enthalpy ( $\Delta H_{obs}$ ) was obtained by integration over the peak for each injection in the plot of heat flow  $P$  against time  $t$ . All of the measurements were conducted at 25 °C.

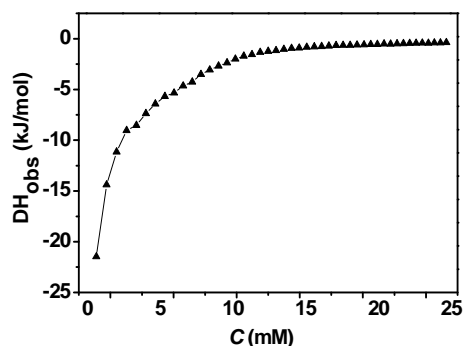

**Fig. S2** Variation of the observed enthalpy ( $\Delta H_{obs}$ ) with the concentration ( $C$ ) of compound **2** dissolved in the mixture of HEPES buffer (10 mM, pH = 7.4) and THF (200:1, v/v).

#### 4. Variation of the fluorescence intensity of silole 1 at 467 nm in the different concentration of HEPES buffer

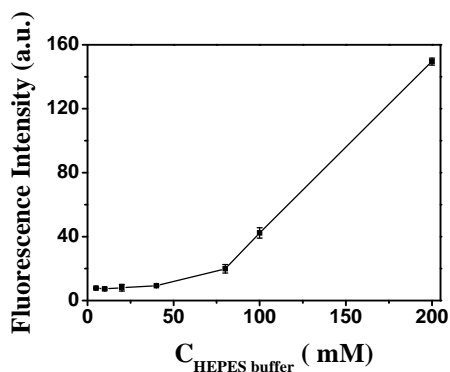

Fig. S3 Variation of the fluorescence intensity of silole 1 ( $7.5 \times 10^{-5}$  M) at 467 nm vs. concentration of HEPES buffer in the mixture of HEPES buffer (pH = 7.4) and THF (200:1, v/v).

#### 5. Variation of the fluorescence intensity of silole 1 at 467 nm under different control experimental conditions

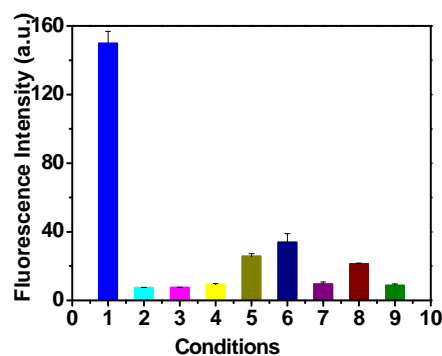

Fig. S4 Variation of the fluorescence intensity at 467 nm under different conditions: 1) silole 1/heptylamine/NaHSO<sub>3</sub>/MAO-B; 2) silole 1/ NaHSO<sub>3</sub>; 3) silole 1/heptylamine; 4) silole 1/heptylaldehyde; 5) silole 1/MAO-B; 6) silole 1/ NaHSO<sub>3</sub>/MAO-B; 7) silole 1/heptylamine/NaHSO<sub>3</sub>; 8) silole 1/heptylamine /MAO-B; 9) silole 1; the concentrations of silole 1, heptylamine, heptylaldehyde, NaHSO<sub>3</sub> and MAO-B employed for the experiments were  $7.5 \times 10^{-5}$  M,  $2.0 \times 10^{-4}$  M,  $1.0 \times 10^{-4}$  M,  $1.0 \times 10^{-4}$  M and 2.2  $\mu\text{g/mL}$ , respectively, in the mixture of HEPES buffer (10 mM, pH = 7.4) and THF (200:1, v/v); in each case the solution was incubated for 10.0 min. before the recording of the fluorescence spectrum ( $\lambda_{\text{ex}} = 370$  nm).

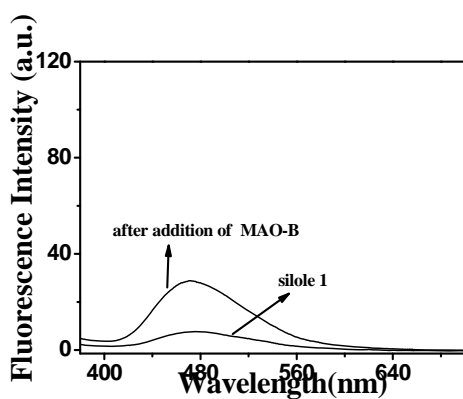

**Fig. S5** Fluorescence spectra of silole **1** ( $7.5 \times 10^{-5}$  M) in the absence and presence of MAO-B (2.2  $\mu\text{g/mL}$ ) in the mixture of HEPES buffer (10 mM, pH = 7.4) and THF (200:1, v/v); in each case the solution was incubated for 10 min. at room temperature before the recording of the fluorescence spectrum ( $\lambda_{\text{ex}} = 370$  nm).

## 6. The dynamic light scattering results

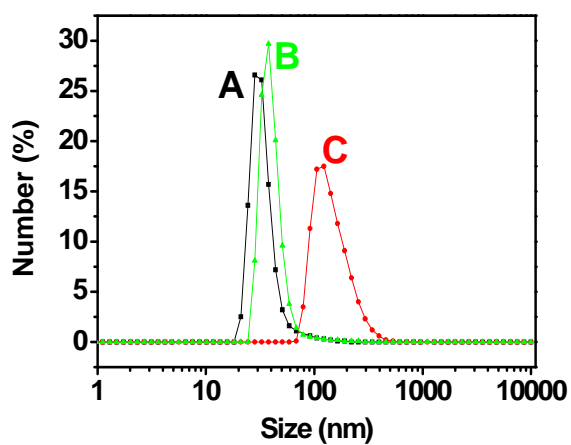

**Fig. S6** The dynamic light scattering results for the solution of silole **1** ( $7.5 \times 10^{-5}$  M), heptylamine ( $2.0 \times 10^{-4}$  M) (A), that after addition of MAO-B (2.2  $\mu\text{g/mL}$ ) (B) and that after further addition of NaHSO<sub>3</sub> ( $1.0 \times 10^{-4}$  M) (C); the mixture of HEPES buffer (10 mM, pH = 7.4) and THF (200:1, v/v) was used as the solvent for all cases.

### 7. The effect of ionic strength on the fluorescence variation

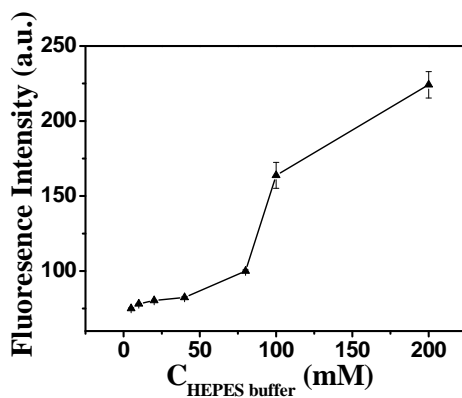

**Fig. S7** Variation of the fluorescence intensity at 467 nm for the ensemble of silole **1** ( $7.5 \times 10^{-5}$  M), heptylamine ( $2.0 \times 10^{-4}$  M),  $\text{NaHSO}_3$  ( $1.0 \times 10^{-4}$  M) and MAO-B ( $2.2 \mu\text{g/mL}$ ) vs. concentration of HEPES buffer in the mixture of HEPES buffer (pH = 7.4) and THF (200:1, v/v), in each case the solution was incubated for 10.0 min. at room temperature before the recording of the fluorescence spectrum ( $\lambda_{\text{ex}} = 370$  nm).

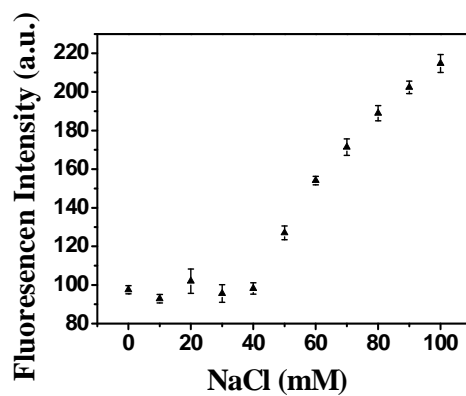

**Fig. S8** Variation of the fluorescence intensity at 467 nm for the ensemble of silole **1** ( $7.5 \times 10^{-5}$  M), heptylamine ( $2.0 \times 10^{-4}$  M),  $\text{NaHSO}_3$  ( $1.0 \times 10^{-4}$  M) and MAO-B ( $2.2 \mu\text{g/mL}$ ) vs. the concentration of NaCl in the mixture of HEPES buffer (10 mM, pH = 7.4) and THF (200:1, v/v); in each case the solution was incubated for 10.0 min. at room temperature before the recording of the fluorescence spectrum ( $\lambda_{\text{ex}} = 370$  nm).

**8. Fluorescence spectra of the ensemble of silole 1, heptylamine and MAO-B in the presence of  $\text{HSO}_3^-$  and those in the presence of cysteine and glutathione reduced form**

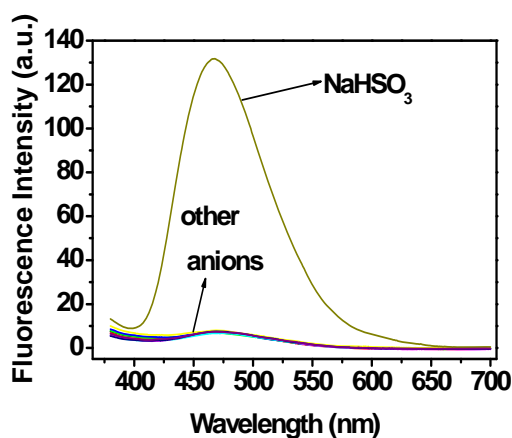

**Fig. S9** Fluorescence spectrum ( $\lambda_{\text{ex.}} = 370$  nm) of the ensemble of silole **1** ( $7.5 \times 10^{-5}$  M), heptylamine ( $2.0 \times 10^{-4}$  M) and MAO-B ( $2.2 \mu\text{g/mL}$ ) in the mixture of HEPES buffer (10 mM, pH = 7.4) and THF (200:1, v/v) in the presence of  $\text{NaHSO}_3$  and those in the presence of  $\text{NaOAc}$ ,  $\text{NaF}$ ,  $\text{NaBr}$ ,  $\text{NaCl}$ ,  $\text{NaN}_3$ ,  $\text{NaNO}_3$ ,  $\text{NaHSO}_4$ ,  $\text{NaH}_2\text{PO}_4$  and  $\text{NaClO}_4$ , respectively; the concentration of  $\text{NaHSO}_3$  was  $2.0 \times 10^{-4}$  M and those of other salts were  $2.0 \times 10^{-3}$  M; each solution was incubated for 10.0 min. before the recording of the fluorescence spectrum.

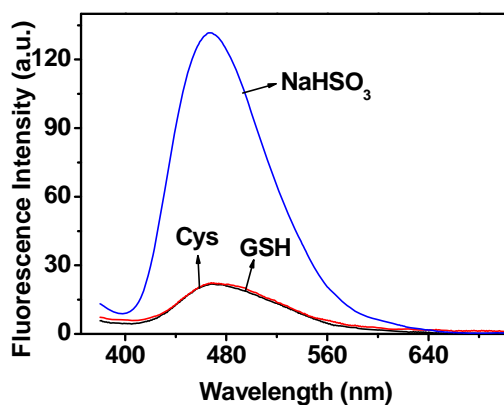

**Fig. S10** Fluorescence spectrum ( $\lambda_{\text{ex.}} = 370$  nm) of the ensemble of silole **1** ( $7.5 \times 10^{-5}$  M), heptylamine ( $2.0 \times 10^{-4}$  M) and MAO-B ( $2.2 \mu\text{g/mL}$ ) in the mixture of HEPES buffer (10 mM, pH = 7.4) and THF (200:1, v/v) in the presence of  $\text{NaHSO}_3$  and those in the presence of *L*-cysteine and glutathione reduced form (GSH), respectively; the concentration of  $\text{NaHSO}_3$  was  $2.0 \times 10^{-4}$  M and those of *L*-cysteine and glutathione reduced form were  $2.0 \times 10^{-3}$  M; each solution was incubated for 10.0 min. before the recording of the fluorescence spectrum.

9. The fluorescence spectra of silole 1 in the presence of different amounts of compound 2

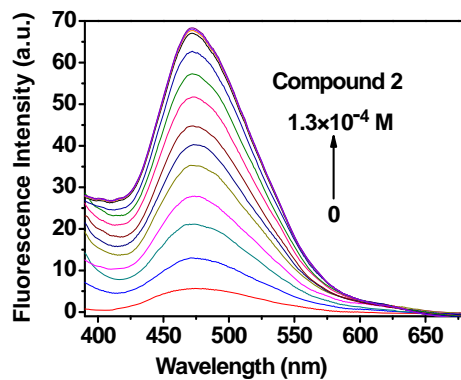

Fig. S11 Fluorescence spectra of the ensemble of silole 1 ( $7.5 \times 10^{-5}$  M) in the mixture of HEPES buffer (10 mM, pH = 7.4) and THF (200:1, v/v) in the presence of different concentrations of compound 2 (from 0 to  $1.3 \times 10^{-4}$  M).

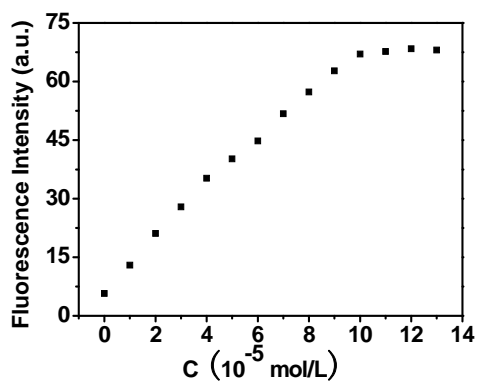

Fig. S12 The plot of fluorescence intensity of silole 1 at 467 nm vs. the concentrations ( C ) of compound 2.

10.  $^1\text{H}$ NMR and  $^{13}\text{C}$ NMR of compound 2

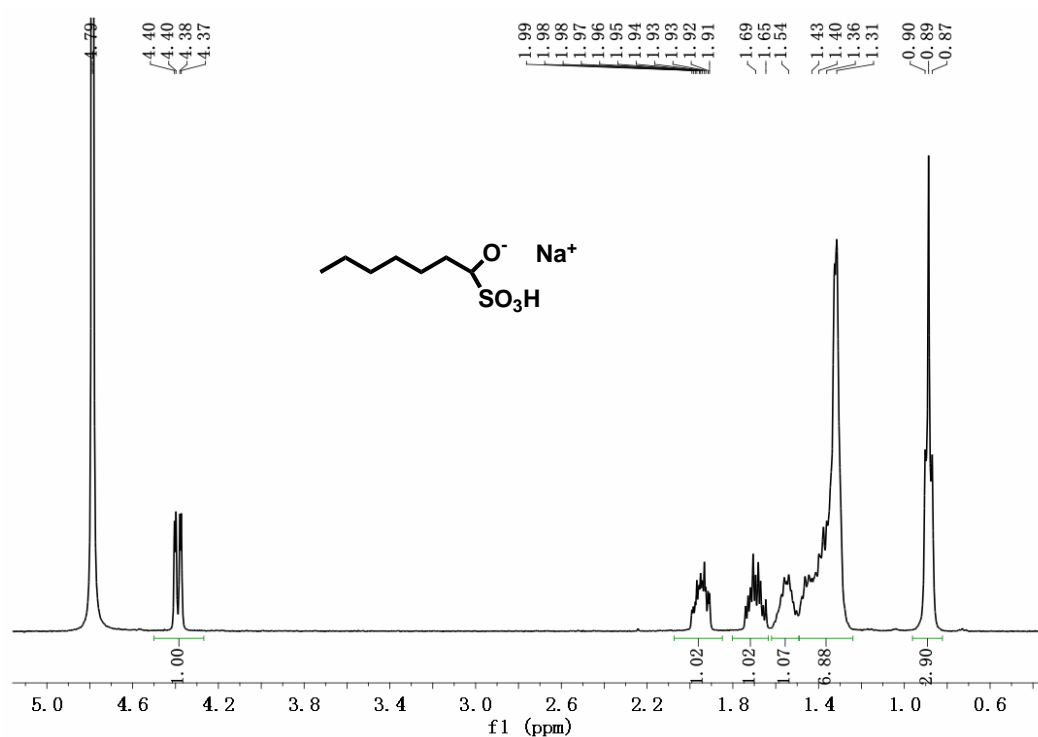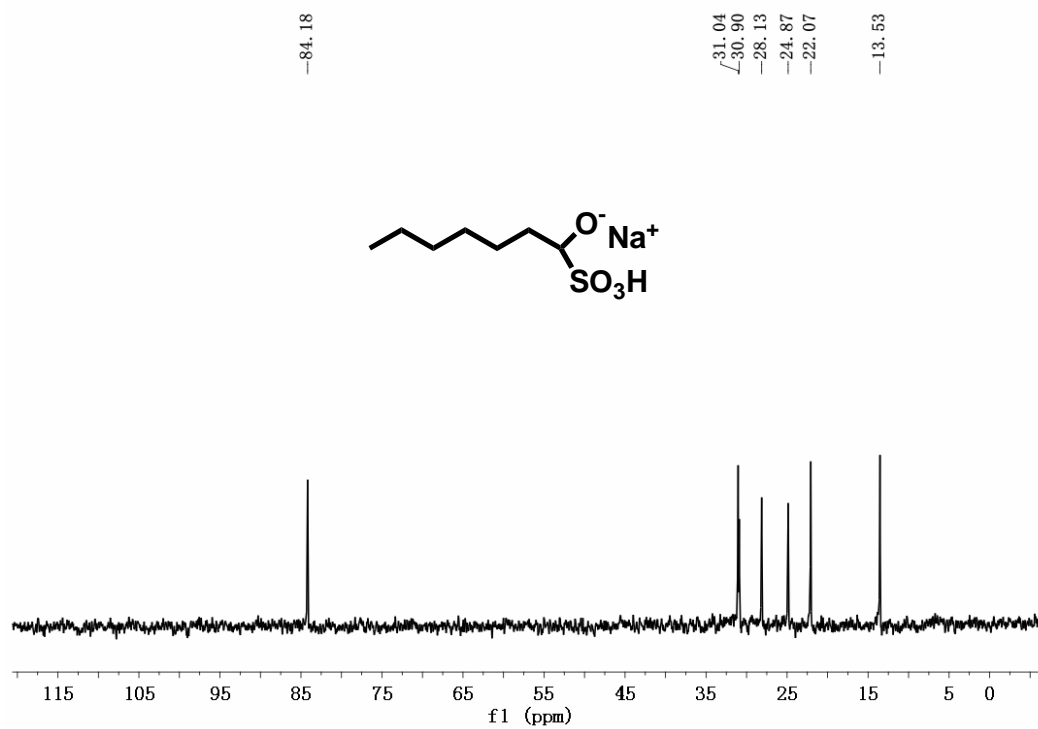

Supplement: c0an00168f.pdf [file c0an00168f.pdf]
